# Supplementary material for: Leaf Extract of Perilla frutescens (L.) Britt Promotes Adipocyte Browning via the p38 MAPK Pathway and PI3K-AKT Pathway
Source: MDPI journal article supplement (doi:10.3390/nu15061487), 2023-03-20
Supplement: s1 [file s1]

Table S1 Primer sequences used for semi-quantitative RT-PCR analysis

| gene           | Forward primer         | Reverse primer           |
|----------------|------------------------|--------------------------|
| $\beta$ -actin | AACAGTCCGCCTAGAAGCAC   | CGTTGACATCCGTAAAGACC     |
| Ucp1           | TCTCAGCCGGCTTAATGACTG  | GGCTTGCACTCTGACCTTCAC    |
| Pgc-1 $\alpha$ | GAAAGGGCCAAACAGAGAGA   | GTAAATCACACGGCGCTCTT     |
| Prdm16         | ACACGCCAGTTCTCCAACCTGT | TGCTTGTTGAGGGAGGAGGTA    |
| Cidea          | TCCTATGCTGCACAGATGACG  | TGCTCTTCTGTATCGCCCAGT    |
| Zfp423         | CAGGCCCAACAAGAACAAG    | GTATCCTCGCAGTAGTCGCACA   |
| Fabp4          | GATGAAATCACCGCAGACGAC  | ATTCCACCACCAGCTTGTCAC    |
| Leptin         | TGAGTTTGTCCAAGATGGACC  | GCCATCCAGGCTCTCTGG       |
| Pparg          | TGCTGTTATGGGTGAAACTCTG | CTGTGTCAACCATGGTAATTTCTT |
| Cox7a1         | CAGCGTCATGGTCAGTCTGT   | AGAAAACCGTGTGGCAGAGA     |
